# Supplementary material
Source: PubMed Central journal article supplement (PMC5859579)

**Supplementary Figure 2**  
**Percentage of waking hours spent in sedentary, low-, and moderate-intensity physical activity**

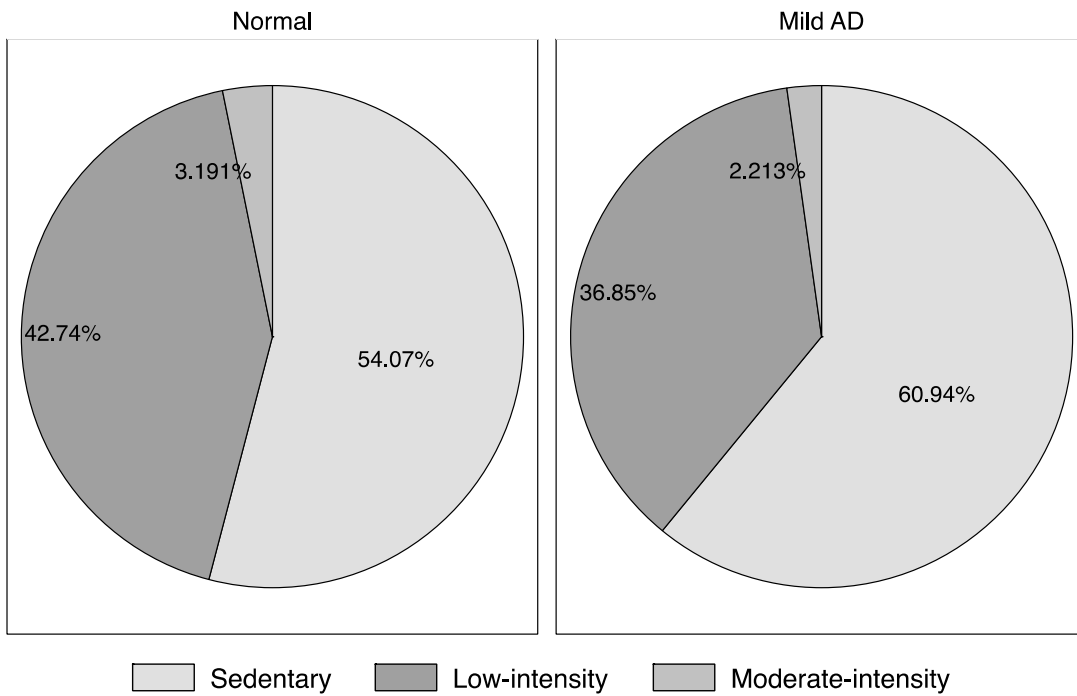

Supplement: NIHMS949539-supplement-Supplementary_Figure_2.pdf [file NIHMS949539-supplement-Supplementary_Figure_2.pdf]
