# Supplementary material
Source: PubMed Central journal article supplement (PMC5859579)

## Supplementary Figure 1

### Correlation between Physical activity (PA) measures and VO2 Max

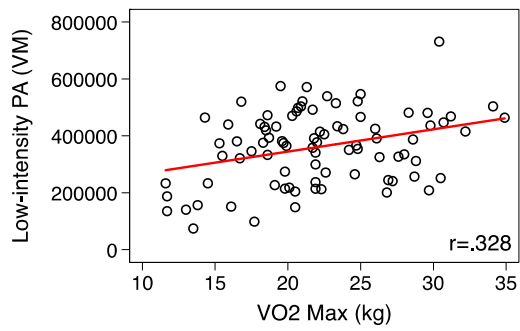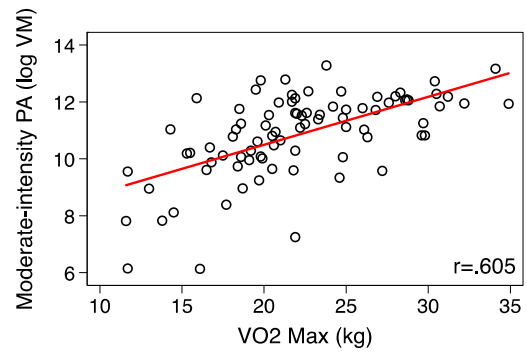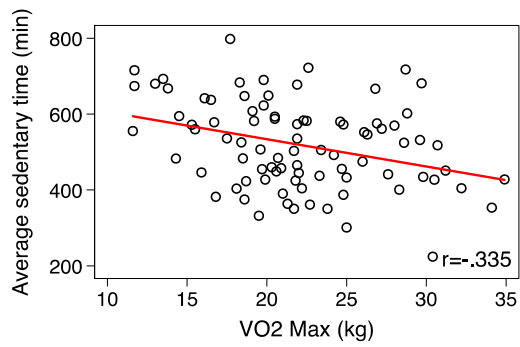

Supplement: NIHMS949539-supplement-Supplementary_Figure_1.pdf [file NIHMS949539-supplement-Supplementary_Figure_1.pdf]
